# Supplementary material for: Has COVID-19 Changed the Lifestyle and Dietary Habits in the Spanish Population after Confinement?
Source: MDPI journal article supplement (doi:10.3390/foods10102443), 2021-10-14
Supplement: s1 [file s1]

**Table S1.** Questionnaire used in the study

**SOCIODEMOGRAPHIC PARAMETERS**

---

**Gender**

Male

Female

Other

Age

25-34

35-44

45-55

55-64

**Place of residence**

Living alone

Shared house

Family home

Collective residence

**Work type**

Presential

Blended job

Unemployed

Student

Other

**How many times do you eat per day?**

<3

3-5

>5

**Which is your mode of eating?**

Alone

Shared with family/friends

Watching TV/PC

Others

**How many days per week do you order food delivery?**

0

1-3

4-6

>6

## **NUTRITIONAL HABITS**

---

**Do you eat bread diary?**

Yes

No

**If yes, which type of bread?**

Wheat bread

Whole wheat bread

Other types

**Do you eat oil diary?**

Yes

No

**Which type of oil?**

Olive oil

Sunflower oil

Coconut oil

**Vegetable serving (per day)**

0

1

2

3

4

5

**Fruit serving (per day)**

0

1

2

3

4

5

**Milk/Dairy serving (per day)**

1

2

3

4

5

**Dried fruit serving (per day)**

0

1

2

3

4

5

**Legume serving (per week)**

0

1

2

3

4

5

6

7

**Potatoes, pasta, rice serving (per week)**

0

1

2

3

4

5

6

7

**Eggs serving (units/ per week)**

0

1

2

3

4

5

6

7

**Sugary drinks (units/per week)**

0

1

2

3

4

5

6

≥7

**Snacks (units/per week)**

0

1

2

3

4

5

6

≥7

**Industrial pastries (units per week)**

0

1

2

3

4

5

6

≥7

**FOOD CONSUMPTION**

---

**No consumed in a week**

Vegetable drink

Red meat

White meat

Sausage meat

White fish

Blue fish

**Consumed 1-2 serving/week**

Vegetable drinks

Red meat

White meat

Sausage meat

White fish

Blue fish

**Consumed  $\geq 3$  serving/week**

Vegetable drinks

Red meat

White meat

Sausage meat

White fish

Blue fish

## **PHYSICAL ACTIVITY**

---

**Do you practice sport?**

Yes

No

**Where do you practice sport?**

Home

Outdoor

Sport centre

**How many days practice sport (days/week)?**

0

1

2

3

4

5

6

7

**Time session (min)**

0

<30

30-60

>60

## **TOXIC HABITS**

---

**Do you usually smoke?**

Yes

No

**Do you increase/decrease smoking after the confinement?**

No

Increase

Equal

Decrease

**Do you usually drink alcohol?**

Yes

No

**Do you increase/decrease drinking alcohol after the confinement?**

No

Increase

Equal

Decrease

**Do you consider that your diet habit has been modified by the confinement?**

Yes

No

**Have you gained weight during the postconfinement?**

Increase

Equal

Decrease

Others

## **ADHERENCE TO MEDITERRANEAN DIET (0 low; 10 high)**

---

1. Olive oil ( $\geq 1$  spoon/day)

2. Fruit ( $\geq 1$  serving/day)
3. Vegetables or salad ( $\geq 1$  serving/day)
4. Fruit ( $\geq 1$  serving/day) and vegetables ( $\geq 1$  serving/day)
5. Legumes ( $\geq 2$  servings/week)
6. Fish ( $\geq 3$  servings/week)
7. Wine ( $\geq 1$  glass/day)
8. Meat ( $< 1$  serving/day)
9. White bread ( $< 1$ /day) and rice ( $< 1$ /week)
10. One point is added when  $\geq 1$  extra serving/day of both fruits and vegetables is consumed
